# Supplementary material for: Monitoring the Attack Incidences and Damage Caused by the Almond Bark Beetle, Scolytus amygdali, in Almond Orchards
Source: MDPI journal article supplement (doi:10.3390/insects9010001), 2018-01-01
Supplement: s1 [file s1]

Article

# Monitoring the Attack Incidences and Damage Caused by the Almond Bark Beetle, *Scolytus amygdali*, in Almond Orchards

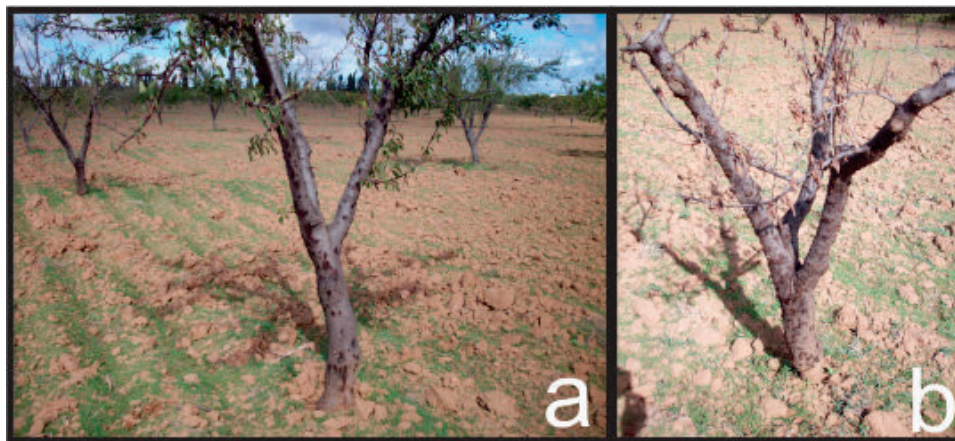

**Figure S1.** Trees infested by *S. amygdali*, (a) Partially infested; (b) completely infested tree.

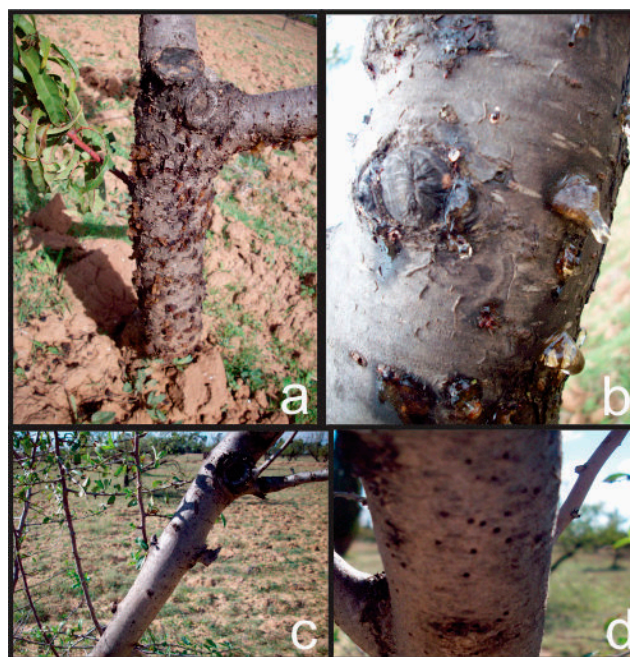

**Figure S2.** (a,b)—damage of *S. amygdali* gum deposits on a tree; (c,d)—tunnel holes on a tree.
